# Supplementary material for: Application of Percutaneous Renal Denervation in Hemodialysis Patients with Malignant Hypertension: A Case Report and Literature Review
Source: Research Square preprint supplement (doi:10.21203/rs.3.rs-8367719/v1), 2025-12-30
Supplement: Supplementary file 1 [file 7ac2bab7baaa07424ca6e5b6.docx]

**Table 1. Serum markers related to hypertension(Case 1)**

|  | Result | Unit | Reference Range |
| --- | --- | --- | --- |
| Angiotensin I (AT-I) | 49.71 | pg/ml | Standing Position：4.00-38.00  Recumbent Position：4.00-24.00 |
| ALD/AT1 | 6.56 |  |  |
| Cortisol (F) | 349.18 |  | 7-9am：117.75-686.85nmol/L  3-5pm：80.16-478.17nmol/L |
| Adrenocorticotropic Hormone (ACTH) | 30.74 | pg/ml | 7.2-63.4 |
| Aldosterone (ALD) | 326.22 | pg/ml | Standing Position：40.00-310.00  Recumbent Position：10.00-160.00 |
| Angiotensin II (AT-II) | 189.46 | pg/ml | Standing Position：119.00-252.00  Recumbent Position：25.00-129.00  Normal Diet (Recumbent)：40.20±12.00  Normal Diet (Standing)：85.30±30.00  Low-Sodium Diet (Recumbent)：65.80±35.20  Low-Sodium Diet (Standing)：92.50±28.20 |

**Table 2. Serum markers related to hypertension(Case 2)**

|  | Result | Unit | Reference Range |
| --- | --- | --- | --- |
| Angiotensin I (AT-I) | 1.69 | ng/ml |  |
| ALD/AT1 | 5.45 |  |  |
| Cortisol (F) | 87.56 |  | 8am：40-220ng/ml  4pm：30-170ng/mL |
| Adrenocorticotropic Hormone (ACTH) | 12.1 | pmol/L | 1.33-10.61 |
| Aldosterone (ALD) | 30.51 | pg/ml | 8-10am：30.00-160.00 |
| Angiotensin II (AT-II) | ＜15 | pg/ml | Recumbent Position≤52 |

**Table 3. Baseline Characteristics and Outcomes**

|  | Case 1 | Case 2 |
| --- | --- | --- |
| Age,y | 60 | 41 |
| Sex | Female | Female |
| Height,cm | 158 | 167 |
| Weight,kg | 50 | 69 |
| Body mass index,kg/m2 | 20 | 24.7 |
| Smoking | Nonsmoker | Nonsmoker |
| Alcohol consumption | Nondrinker | Nondrinker |
| Number of antihypertensive medications | 6 | **5** |
| Number of pills | 11 | **4** |
| Comorbidity | Chronic Kidney Disease Stage 5;  Hemodialysis Status; History of Secondary Hyperparathyroidism; Thyroid Nodule (Category 4a);  Personal History of Cerebral Infarction | Coronary Artery Atherosclerotic Heart Disease, Cardiac Function Class II;  Chronic Kidney Disease Stage 5 (CKD Stage 5), Hemodialysis Status , Renal Anemia;  Type 2 Diabetes Mellitus with Multiple Complications (Type 2 Diabetic Peripheral Neuropathy, Type 2 Diabetic Nephropathy, Type 2 Diabetic Peripheral Vascular Disease);  Personal History of Cerebral Infarction |
| Renal artery anatomy |  |  |
| Right |  |  |
| Left |  |  |
| Total procedure time, min | 60 |  |
| Contrast Medium Dosage | Iodixanol injection (100mg) | Iohexol injection (80ml) |
| Estimaated blood loss,ml | 20 |  |
| Anesthesia Plan | 2ng/ml Induction: Propofol TCI 4 μg/ml + Sufentanil 0.3 μg/kg  Maintenance: Propofol TCI 3 μg/ml + Remifentanil 2 ng/ml | Patient-controlled Analgesia Pump |
| Renal function Cr (μmol/L) | 812 | 445 |
| eGFR（ml/min/1.732） | 4.19 | 9.88 |
| Hemodialysis, y | 3 | 1 |
| Thyroid Function |  |  |
| Free Thyroxine (FT4, pmol/L) | 14.89 | 18.9 |
| Thyroid-Stimulating Hormone (TSH, uIU/ml) | 1.85 | 1.68 |
| Triiodothyronine (T3, nmol/L) | 1.19 | 1.69 |
| Thyroxine (T4,pg/ml) | 82.76 | 78.91 |
| Free Triiodothyronine (FT3, pmol/L) | 3.19 | 4.04 |
| Blood pressure（systolic/diastolic）,mmHg |  |  |
| 24h ambulatory BP |  |  |
| Overall | 168/108 | / |
| Daytime | 172/111 | / |
| Nighttime | 159/102 | / |
| Number of antihypertensive medication （postoperative period） | 3 | 1 |
| Number of pills（postoperative period） | 5 | 2 |
| Postoperative blood pressure |  |  |
| Day 1 | 163/108 | 172/87 |
| Day2 | 190/120 | 129/57 |
| Day3 | 143/97 | 136/64 |
| Day 30（average） | 149/97 | 146/70 |
| Day 60（average） | 147/96 | 143/68 |
| Day 90（average） | 143/91 | 143/70 |
| Day 150（average） | 135/84 | / |
