# Supplementary material for: Application of Percutaneous Renal Denervation in Hemodialysis Patients with Malignant Hypertension: A Case Report and Literature Review
Source: Research Square preprint supplement (doi:10.21203/rs.3.rs-8367719/v1), 2025-12-30
Supplement: Supplementary file 2 [file 7e1909b7f873b1b124be948b.docx]

**List of Abbreviations**

| **English Abbreviation** | **English Full Name** |
| --- | --- |
| RDN | renal denervation |
| eGFR | estimated glomerular filtration rate |
| CKD | chronic kidney disease |
| RAAS | renin-angiotensin-aldosterone system |
| ESRD | end-stage renal disease |
| FDA | Food and Drug Administration |
| ABPM | ambulatory blood pressure monitoring |
| SBP | systolic BP |
| DBP | diastolic BP |
| CTA | computed tomography angiography |
| TCI | target-controlled infusion |
| BP | blood pressure |
| HR | heart rate |
| BMP | beats per minute |
| BID | twice daily |
| QD | once daily |
| T2DM | type 2 diabetes mellitus |
| ACI | acute cerebral infarction |
| SH | secondary hypertension |
| PCA | patient-controlled analgesia |
| SNS | Sympathetic Nervous System |
| LVMI | left ventricular mass index |
| OSA | obstructive sleep apnea |
| ESC | European Society of Cardiology |
| ESH | European Society of Hypertension |
| RCTs | randomized controlled trials |
